# Supplementary material
Source: PubMed Central journal article supplement (PMC4424608)

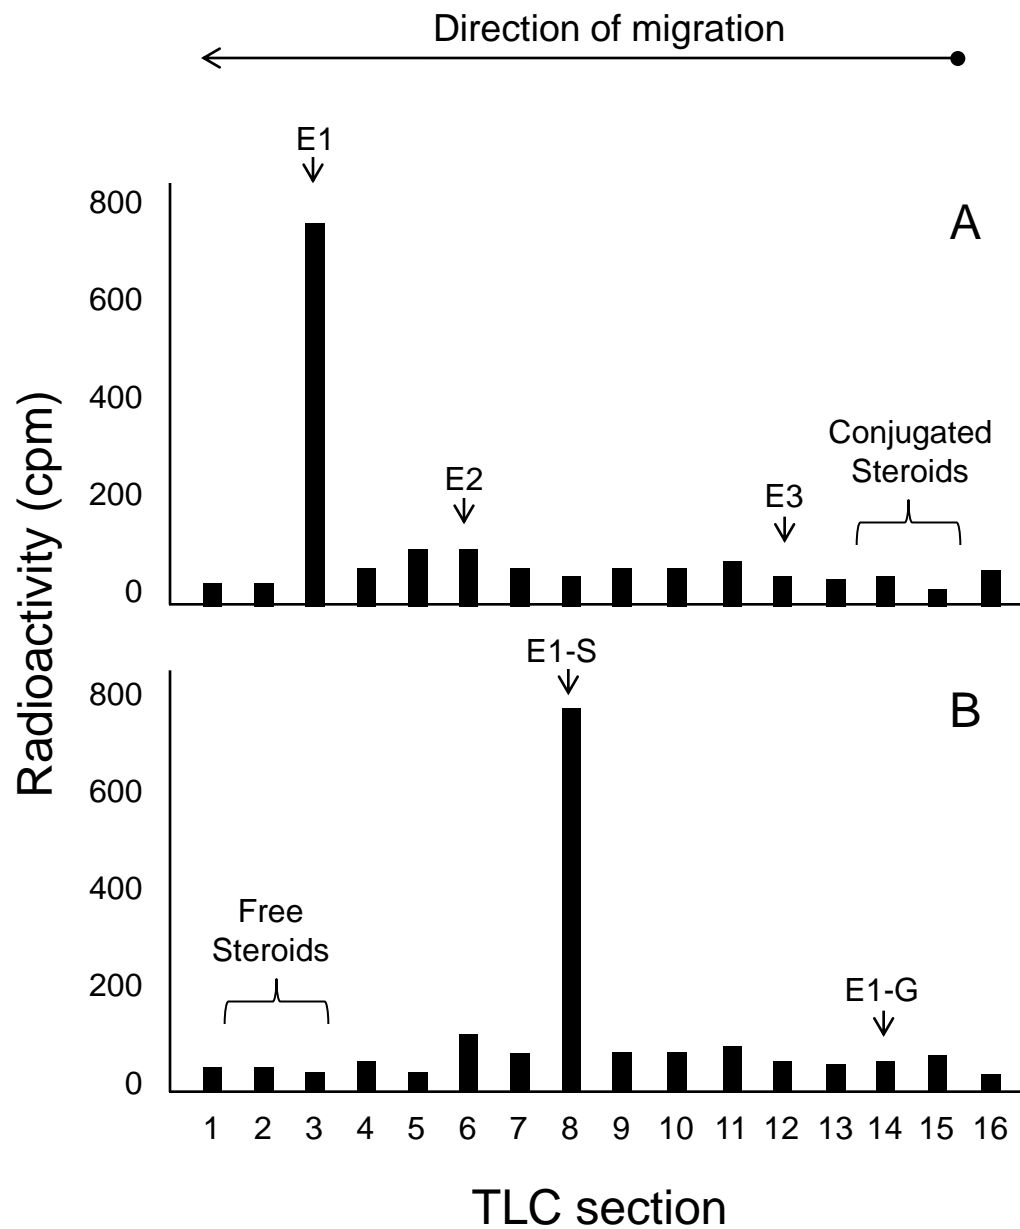

Supplement: rsbl20140946supp3.pdf [file rsbl20140946supp3.pdf]
